# Supplementary material
Source: publisher figshare collection journal article supplement (https://acs.figshare.com/ndownloader/files/5107684)
Supplement: Supplementary file 1 [file 5107684]

# SUBMISSION DETAILS 
_publ_contact_author_name            ' Chisato Mukai'
_publ_contact_author_address
;
Division of Pharmaceutical Sciences
Graduate School of Natural Science and Technology
Kanazawa University
Kakuma-machi, Kanazawa, 920-1192 Japan
;
_publ_contact_author_email            ' cmukai@kenroku.kanazawa-u.ac.jp '
_publ_contact_author_fax              ' +81-76-234-4410 '
_publ_contact_author_phone            ' +81-76-234-4450 '
_publ_contact_letter
;
    ENTER TEXT OF LETTER
;
_publ_requested_journal               ' Journal of Organic Chemistry'
#------------------------------------------------------------------------------
# TITLE AND AUTHOR LIST 
_publ_section_title
;
Rh(I)-Catalyzed Cycloisomerization of the Allenynes:
Selective Preparation of the Monocyclic-, Bicyclo[m.3.0]-, and
Bicyclo[m.2.0]-Ring Systems
; 

_publ_section_title_footnote
;
    ENTER FOOTNOTE TO TITLE OF PAPER
;

loop_
	_publ_author_name
	_publ_author_footnote
	_publ_author_address
' Chisato Mukai '
;
  FIRST AUTHORS FOOTNOTES
;
;
Division of Pharmaceutical Sciences
Graduate School of Natural Science and Technology
Kanazawa University
Kakuma-machi, Kanazawa, 920-1192 Japan
;
' Fuyuhiko Inagaki '
;
  SECOND AUTHORS FOOTNOTES
;
;
Division of Pharmaceutical Sciences
Graduate School of Natural Science and Technology
Kanazawa University
Kakuma-machi, Kanazawa, 920-1192 Japan
;
' Tatsunori Yoshida '
;
  THIRD AUTHORS FOOTNOTES
;
;
Division of Pharmaceutical Sciences
Graduate School of Natural Science and Technology
Kanazawa University
Kakuma-machi, Kanazawa, 920-1192 Japan
;
' Katsuya Yoshitani '
;
  FORTH AUTHORS FOOTNOTES
;
;
Division of Pharmaceutical Sciences
Graduate School of Natural Science and Technology
Kanazawa University
Kakuma-machi, Kanazawa, 920-1192 Japan
;
' Yasuyuki Hara '
;
  FIFTH AUTHORS FOOTNOTES
;
;
Division of Pharmaceutical Sciences
Graduate School of Natural Science and Technology
Kanazawa University
Kakuma-machi, Kanazawa, 920-1192 Japan
;
' Shinji Kitagaki '
;
  SIXTH AUTHORS FOOTNOTES
;
;
Division of Pharmaceutical Sciences
Graduate School of Natural Science and Technology
Kanazawa University
Kakuma-machi, Kanazawa, 920-1192 Japan
;

_publ_section_synopsis
;
  ENTER SYNOPSIS
;
#------------------------------------------------------------------------------
data_mukai
#------------------------------------------------------------------------------
# CHEMICAL DATA 
_chemical_formula_sum                  'C23 H24 O2 S '
_chemical_formula_moiety               '?'
_chemical_formula_weight               364.50
_chemical_melting_point                ?
#------------------------------------------------------------------------------
# CRYSTAL DATA 
_symmetry_cell_setting                 orthorhombic
_symmetry_space_group_name_H-M        'P 21 21 21'

loop_
_symmetry_equiv_pos_as_xyz
x,y,z
1/2+x,1/2-y,-z
-x,1/2+y,1/2-z
1/2-x,-y,1/2+z

_cell_length_a                         14.615(1)
_cell_length_b                         15.929(1)
_cell_length_c                         8.391(2)
_cell_angle_alpha                      90
_cell_angle_beta                       90
_cell_angle_gamma                      90
_cell_volume                           1953.3(5)
_cell_formula_units_Z                  4
_cell_measurement_reflns_used          ?
_cell_measurement_theta_min            ?
_cell_measurement_theta_max            ?
_cell_measurement_temperature          ?
#------------------------------------------------------------------------------
_exptl_crystal_description            'prism'
_exptl_crystal_colour                 'colorless'
_exptl_crystal_size_max                0.100
_exptl_crystal_size_mid                0.100
_exptl_crystal_size_min                0.100
_exptl_crystal_size_rad                ?
_exptl_crystal_density_diffrn          1.239
_exptl_crystal_density_meas            ?
#------------------------------------------------------------------------------
# EXPERIMENTAL DATA 
_diffrn_radiation_type                'Cu K\a'
_diffrn_radiation_wavelength           1.54178
_diffrn_measurement_device_type       'Rigaku AFC5R'
_diffrn_reflns_number                  1707
_diffrn_reflns_av_R_equivalents        ?
#------------------------------------------------------------------------------
# REFINEMENT DATA 
_refine_ls_R_factor_gt                 0.044
_refine_ls_wR_factor_ref               0.068
_refine_ls_goodness_of_fit_ref         1.360

loop_
#------------------------------------------------------------------------------
# ATOMIC COORDINATES AND DISPLACEMENT PARAMETERS 
_atom_site_label
_atom_site_fract_x
_atom_site_fract_y
_atom_site_fract_z
 S(1)   0.60404(8)  0.38164(8)  0.3637(1) 
 O(1)   0.5700(3)   0.4623(3)   0.4132(6)  
 O(2)   0.6719(2)   0.3411(3)   0.4604(5)
 C(1)   0.6499(3)   0.3922(2)   0.1658(5)  
 C(2)   0.7217(4)   0.4632(3)   0.1668(7)  
 C(3)   0.8161(3)   0.4406(3)   0.2293(7)  
 C(4)   0.8640(3)   0.3712(3)   0.1387(3)  
 C(5)   0.8360(4)   0.2816(3)   0.1866(8)  
 C(6)   0.7478(2)   0.2498(4)   0.1201(6) 
 C(7)   0.6764(2)   0.3109(2)   0.0852(5)  
 C(8)   0.6137(3)   0.3210(3)  -0.0311(5)  
 C(9)   0.5749(3)   0.4012(3)   0.0361(6)  
 C(10)  0.5084(3)   0.3134(3)   0.3482(6)  
 C(11)  0.4213(3)   0.3465(3)   0.3508(8)  
 C(12)  0.3471(4)   0.2920(4)   0.3382(8)  
 C(13)  0.3593(4)   0.2083(4)   0.3233(8)  
 C(14)  0.4471(5)   0.1758(4)   0.3180(1)  
 C(15)  0.5220(4)   0.2287(3)   0.3336(8)  
 C(16)  0.7331(3)   0.1682(3)   0.0859(6) 
 C(17)  0.7948(3)   0.0963(2)   0.1041(4)  
 C(18)  0.7886(4)   0.0310(3)  -0.0040(1)  
 C(19)  0.8423(4)  -0.0381(3)   0.0045(9)  
 C(20)  0.9040(3)  -0.0470(3)   0.1250(8)  
 C(21)  0.9120(3)   0.0145(3)   0.2357(7)  
 C(22)  0.8574(3)   0.0857(3)   0.2259(7)  
 C(23)  0.5919(3)   0.2753(4)  -0.1807(7)  
 H(1)   0.722(3)    0.485(3)    0.055(7)    
 H(2)   0.692(4)    0.512(4)    0.233(8)   
 H(3)   0.812(4)    0.416(4)    0.370(8)  
 H(4)   0.858(4)    0.495(3)    0.216(6)
 H(5)   0.931(3)    0.372(3)    0.173(6) 
 H(6)   0.854(4)    0.378(3)    0.021(8)  
 H(7)   0.845(3)    0.273(3)    0.290(6)    
 H(8)   0.890(4)    0.246(3)    0.167(6)   
 H(9)   0.515(3)    0.396(3)    0.069(5) 
 H(10)  0.582(3)    0.466(3)   -0.004(6)   
 H(11)  0.418(4)    0.402(4)    0.316(7)  
 H(12)  0.278(4)    0.313(4)    0.336(8)   
 H(13)  0.308(4)    0.160(3)    0.299(7)  
 H(14)  0.463(4)    0.119(3)    0.320(6)    
 H(15)  0.584(7)    0.219(6)    0.36(1) 
 H(16)  0.676(3)    0.146(3)    0.029(6)  
 H(17)  0.753(4)    0.030(3)   -0.083(7)  
 H(18)  0.833(5)   -0.090(3)   -0.10(1)
 H(19)  0.936(4)   -0.107(4)    0.116(8)   
 H(20)  0.958(3)    0.006(3)    0.325(6)  
 H(21)  0.855(4)    0.126(3)    0.297(7)   
 H(22)  0.5423      0.3028     -0.2329   
 H(23)  0.6442      0.2771     -0.2498   
 H(24)  0.5767      0.2195     -0.1584
   
loop_
_atom_site_aniso_label
_atom_site_aniso_U_11
_atom_site_aniso_U_22
_atom_site_aniso_U_33
_atom_site_aniso_U_12
_atom_site_aniso_U_13
_atom_site_aniso_U_23
 S(1)   0.0482(6)   0.0700(7)   0.0514(6)   
 -0.0081(5)    0.0013(5)    -0.0058(6)  
 O(1)   0.079(3)    0.080(2)    0.107(3)    
 -0.016(2)     0.025(2)     -0.047(2)  
 O(2)   0.050(2)    0.144(4)    0.060(2)    
 -0.013(2)    -0.013(2)      0.032(2)   
 C(1)   0.043(2)    0.042(2)    0.053(2)    
 -0.004(2)    -0.003(2)      0.003(2)  
 C(2)   0.056(2)    0.041(2)    0.075(4)   
 -0.003(2)     0.003(2)      0.007(2)  
 C(3)   0.054(2)    0.052(3)    0.074(3)    
 -0.013(2)    -0.004(3)     -0.001(2)  
 C(4)   0.042(2)    0.050(2)    0.084(4)    
 -0.009(2)    -0.001(2)     -0.005(3)   
 C(5)   0.044(3)    0.049(3)    0.087(4)   
  -0.000(2)    -0.021(3)     -0.002(2)   
 C(6)   0.034(2)    0.040(2)    0.055(2)    
 -0.001(2)    -0.000(2)     -0.003(2)   
 C(7)   0.037(2)    0.044(2)    0.052(2)    
 -0.000(2)     0.002(2)      0.002(2)  
 C(8)   0.036(2)    0.061(2)    0.044(2)    
 -0.003(2)    -0.001(2)      0.004(2)  
 C(9)   0.039(2)    0.055(3)    0.060(3)   
  0.007(2)    -0.001(2)      0.012(2)   
 C(10)  0.049(2)    0.065(3)    0.048(2)    
 -0.004(2)     0.001(2)      0.005(2)   
 C(11)  0.045(2)    0.069(3)    0.083(4)    
 -0.001(2)     0.007(3)      0.000(3)  
 C(12)  0.043(3)    0.092(4)    0.087(4)    
 -0.003(3)     0.003(3)     -0.007(3)  
 C(13)  0.064(3)    0.081(4)    0.095(4)    
 -0.016(3)     0.009(3)     -0.006(3)   
 C(14)  0.083(4)    0.060(3)    0.107(5)    
 -0.008(3)     0.012(4)      0.010(3)   
 C(15)  0.051(3)    0.056(3)    0.095(4)   
  0.002(2)     0.007(3)      0.021(3)   
 C(16)  0.042(2)    0.049(2)    0.064(3)   
  -0.005(2)    -0.010(2)     -0.005(2)   
 C(17)  0.042(2)    0.041(2)    0.069(3)   
  -0.006(2)    -0.000(2)     -0.001(2)   
 C(18)  0.06(3)     0.058(3)    0.101(5)   
  -0.000(3)    -0.029(4)     -0.016(3)   
 C(19)  0.080(3)    0.050(3)    0.111(5)   
   0.007(3)    -0.016(4)     -0.016(3)   
 C(20)  0.053(3)    0.048(2)    0.105(4)   
   0.005(2)     0.004(3)      0.011(3)   
 C(21)  0.047(2)    0.061(3)    0.069(3)  
    0.005(2)     0.001(2)      0.014(2)   
 C(22)  0.051(2)    0.050(2)    0.064(3)    
 -0.002(2)     0.005(2)      0.002(2)   
 C(23)  0.048(3)    0.096(4)    0.064(3)   
   0.001(3)    -0.008(2)     -0.003(3) 

#------------------------------------------------------------------------------
_geom_special_details
;
 ?
;

loop_
_geom_bond_atom_site_label_1
_geom_bond_atom_site_label_2
_geom_bond_distance
 S(1)      O(1)      1.439(4)   
 S(1)      O(2)      1.435(4)   
 S(1)      C(1)      1.798(4)   
 S(1)      C(10)     1.775(5)   
 C(1)      C(2)      1.543(6)    
 C(1)      C(7)      1.511(6)    
 C(1)      C(9)      1.551(6)    
 C(2)      C(3)      1.520(7)    
 C(2)      H(1)      1.00(6)    
 C(2)      H(2)      1.05(6)    
 C(3)      C(4)      1.514(8)    
 C(3)      H(3)      1.25(7)    
 C(3)      H(4)      1.07(5)    
 C(4)      C(5)      1.536(7)    
 C(4)      H(5)      1.02(5)    
 C(4)      H(6)      1.00(6)    
 C(5)      C(6)      1.496(6)    
 C(5)      H(7)      0.89(5)    
 C(5)      H(8)      0.99(5)    
 C(6)      C(7)      1.457(6)   
 C(6)      C(16)     1.348(6)    
 C(7)      C(8)      1.348(6)    
 C(8)      C(9)      1.508(6)    
 C(8)      C(23)     1.486(7)    
 C(9)      H(9)      0.92(5)    
 C(9)      H(10)     1.09(5)    
 C(10)     C(11)     1.378(6)    
 C(10)     C(15)     1.369(7)    
 C(11)     C(12)     1.393(7)    
 C(11)     H(11)     0.94(6)    
 C(12)     C(13)     1.351(8)  
 C(12)     H(12)     1.06(6)  
 C(13)     C(14)     1.385(6)  
 C(13)     H(13)     1.09(6)  
 C(14)     C(15)     1.388(8)   
 C(14)     H(14)     0.94(5)   
 C(15)     H(15)     0.9(1)   
 C(16)     C(17)     1.466(6)   
 C(16)     H(16)     1.02(5)  
 C(17)     C(18)     1.386(7)    
 C(17)     C(22)     1.383(7)    
 C(18)     C(19)     1.354(8)    
 C(18)     H(17)     0.84(6)    
 C(19)     C(20)     1.362(9)    
 C(19)     H(18)     1.20(8)   
 C(20)     C(21)     1.355(8)    
 C(20)     H(19)     1.07(6)    
 C(21)     C(22)     1.390(7)    
 C(21)     H(20)     1.02(5)    
 C(22)     H(21)     0.88(6)    
 C(23)     H(22)     0.954    
 C(23)     H(23)     0.961    
 C(23)     H(24)     0.935 
 
#------------------------------------------------------------------------------
loop_
_geom_torsion_atom_site_label_1
_geom_torsion_atom_site_label_2
_geom_torsion_atom_site_label_3
_geom_torsion_atom_site_label_4
_geom_torsion
   S(1)    C(1)    C(2)    C(3)    80.3(5) 
   S(1)    C(1)    C(7)    C(6)    -66.7(5) 
   S(1)    C(1)    C(7)    C(8)    116.8(3) 
   S(1)    C(1)    C(9)    C(8)    -118.6(3) 
   S(1)    C(10)   C(11)   C(12)   179.9(5)  
   S(1)    C(10)   C(15)   C(14)   -178.5(5)  
   O(1)    S(1)    C(1)    C(2)    54.7(2)  
   O(1)    S(1)    C(1)    C(7)    -171.6(3)  
   O(1)    S(1)    C(1)    C(9)    -73.6(3)  
   O(1)    S(1)    C(10)   C(11)   12.9(5)    
   O(1)    S(1)    C(10)   C(15)   -167.2(5)    
   O(2)    S(1)    C(1)    C(2)    -74.6(3)  
   O(2)    S(1)    C(1)    C(7)    59.1(4)  
   O(2)    S(1)    C(1)    C(9)    157.1(3)  
   O(2)    S(1)    C(10)   C(11)   141.7(5)    
   O(2)    S(1)    C(10)   C(15)   -38.4(5)    
   C(1)    S(1)    C(10)   C(11)   -102.7(5)    
   C(1)    S(1)    C(10)   C(15)   77.2(5)    
   C(1)    C(2)    C(3)    C(4)    59.7(6) 
   C(1)    C(7)    C(6)    C(5)    -33.9(7) 
   C(1)    C(7)    C(6)    C(16)   148.5(5) 
   C(1)    C(7)    C(8)    C(9)    -2.6(3) 
   C(1)    C(7)    C(8)    C(23)   173.5(5) 
   C(1)    C(9)    C(8)    C(7)    2.5(3) 
   C(1)    C(9)    C(8)    C(23)   -173.8(5) 
   C(2)    C(1)    S(1)    C(10)   169.7(3) 
   C(2)    C(1)    C(7)    C(6)    62.9(6) 
   C(2)    C(1)    C(7)    C(8)    -113.6(4) 
   C(2)    C(1)    C(9)    C(8)    116.3(4) 
   C(2)    C(3)    C(4)    C(5)    -82.5(6) 
   C(3)    C(2)    C(1)    C(7)    -52.5(6) 
   C(3)    C(2)    C(1)    C(9)    -152.2(5) 
   C(3)    C(4)    C(5)    C(6)    79.1(7)    
   C(4)    C(5)    C(6)    C(7)    -29.1(7) 
   C(4)    C(5)    C(6)    C(16)   148.3(5)  
   C(5)    C(6)    C(7)    C(8)    141.2(5) 
   C(5)    C(6)    C(16)   C(17)   0.1(8)    
   C(6)    C(7)    C(1)    C(9)    179.1(4) 
   C(6)    C(7)    C(8)    C(9)    -178.9(5) 
   C(6)    C(7)    C(8)    C(23)   -2.9(9) 
   C(6)    C(16)   C(17)   C(18)   -147.1(6) 
   C(6)    C(16)   C(17)   C(22)   35.7(8) 
   C(7)    C(1)    S(1)    C(10)   -56.6(3) 
   C(7)    C(1)    C(9)    C(8)    -2.2(3) 
   C(7)    C(6)    C(16)   C(17)   177.5(4)    
   C(8)    C(7)    C(1)    C(9)    2.5(3) 
   C(8)    C(7)    C(6)    C(16)   -36.4(7)  
   C(9)    C(1)    S(1)    C(10)   41.4(3) 
   C(10)   C(11)   C(12)   C(13)   0(1)  
   C(10)   C(15)   C(14)   C(13)   -3(1)  
   C(11)   C(10)   C(15)   C(14)   1(1)  
   C(11)   C(12)   C(13)   C(14)   -1(1) 
   C(12)   C(11)   C(10)   C(15)   -0.1(9) 
   C(12)   C(13)   C(14)   C(15)   2(1) 
   C(16)   C(17)   C(18)   C(19)   -179.3(6)  
   C(16)   C(17)   C(22)   C(21)   178.6(5)  
   C(17)   C(18)   C(19)   C(20)   2(1)  
   C(17)   C(22)   C(21)   C(20)   -0.6(7)  
   C(18)   C(17)   C(22)   C(21)   1.4(7)  
   C(18)   C(19)   C(20)   C(21)   -0.6(9)  
   C(19)   C(18)   C(17)   C(22)   -1.9(9) 
   C(19)   C(20)   C(21)   C(22)   0.1(8) 
#------------------------------------------------------------------------------
